# Supplementary material
Source: PubMed Central journal article supplement (PMC9975904)
Supplement: jama-e230713-s004.pdf [file jama-e230713-s004.pdf]

\*First name, last name, and suffix (if applicable) are required and will appear in PubMed.

| <b>*Group Name(s): RADIANCE II Investigators and Collaborators</b> |                   |                              |                  |                                       |                                          |                                                         |                                                                                            |
|--------------------------------------------------------------------|-------------------|------------------------------|------------------|---------------------------------------|------------------------------------------|---------------------------------------------------------|--------------------------------------------------------------------------------------------|
| <b>*First Name and Middle Initial(s)</b>                           | <b>*Last Name</b> | <b>*Suffix (eg, Jr, III)</b> | Academic Degrees | Institution                           | Location (city, state/province, country) | Role or Contribution, eg, chair, principal investigator | Group (if more than 1 Group listed in the byline) and/or Subgroup (eg, Steering Committee) |
| Christopher                                                        | Mullin            |                              |                  | NAMSA                                 | Minneapolis, MN, USA                     | Biostatistics                                           |                                                                                            |
| Candace K.                                                         | McClure           |                              |                  | NAMSA                                 | Minneapolis, MN, USA                     | Biostatistics                                           |                                                                                            |
| Lisa                                                               | Thackeray         |                              |                  | NAMSA                                 | Minneapolis, MN, USA                     | Biostatistics                                           |                                                                                            |
| Yongshi                                                            | Wang              |                              |                  | BAIM                                  | Boston, MA, USA                          | Biostatistics                                           |                                                                                            |
| Glenn                                                              | Chertow           |                              |                  | Stanford University                   | Stanford, CA, USA                        | DSMB                                                    |                                                                                            |
| Venita                                                             | Chandra           |                              |                  | Stanford University                   | Stanford, CA, USA                        | DSMB                                                    |                                                                                            |
| Harold                                                             | Dauerman          |                              |                  | University of Vermont                 | Burlington, VT, USA                      | DSMB                                                    |                                                                                            |
| Thomas                                                             | Kahan             |                              |                  | Karolinska Institutet                 | Stockholm, Swden                         | DSMB                                                    |                                                                                            |
| Steven                                                             | Ullery            |                              |                  | NAMSA                                 | Minneapolis, MN, USA                     | DSMB                                                    |                                                                                            |
| Nirat                                                              | Beohar            |                              |                  | Mount Sinai Medical Center            | Miami Beach, FL, USA                     | CEC                                                     |                                                                                            |
| Ozgen                                                              | Dogan             |                              |                  | New York Presbyterian/Columbia        | Brooklyn, NY, USA                        | CEC                                                     |                                                                                            |
| Michelle                                                           | Mokrzycki         |                              |                  | Albert Einstein College of Medicine   | Bronk, NY, USA                           | CEC                                                     |                                                                                            |
| Scott                                                              | Mullaney          |                              |                  | UCSD School of Medicine               | San Diego, CA, USA                       | CEC                                                     |                                                                                            |
| Bjorn                                                              | Redfors           |                              |                  | Cardiovascular Research Foundation    | New York, NY, USA                        | CEC                                                     |                                                                                            |
| Huseng                                                             | Vefali            |                              |                  | Weill Cornell SOM NY-Presbyterian-BMH | Brooklyn, NY, USA                        | CEC                                                     |                                                                                            |
| Cardiovascular Research Foundation                                 |                   |                              |                  |                                       | New York, NY, USA                        | Independent Imaging Core Lab                            |                                                                                            |
| Andreas                                                            | Loening           |                              |                  | Stanford University                   | Stanford, CA, USA                        | Independent Radiologists                                |                                                                                            |
| Ron                                                                | Zagoria           |                              |                  | UCSF                                  | San Francisco, CA, USA                   | Independent Radiologists                                |                                                                                            |

## Supplemental Online Content: Nonauthor Collaborators

\*First name, last name, and suffix (if applicable) are required and will appear in PubMed.

| *First Name and Middle Initial(s)                     | *Last Name | *Suffix (eg, Jr, III) | Academic Degrees | Institution                                          | Location (city, state/province, country) | Role or Contribution, eg, chair, principal investigator | Group (if more than 1 Group listed in the byline) and/or Subgroup (eg, Steering Committee) |
|-------------------------------------------------------|------------|-----------------------|------------------|------------------------------------------------------|------------------------------------------|---------------------------------------------------------|--------------------------------------------------------------------------------------------|
| Department of Chemical Pathology & Metabolic Diseases |            |                       |                  | University Hospitals of Leicester Pathology Services | Leicester, United Kingdom                | Urine Core Lab                                          |                                                                                            |
| Nedaa                                                 | Skeik      |                       |                  | Minneapolis Heart Institute Foundation               | Minneapolis, MN, USA                     | Investigator                                            |                                                                                            |
| Richard                                               | Bae        |                       |                  | Minneapolis Heart Institute Foundation               | Minneapolis, MN, USA                     | Investigator                                            |                                                                                            |
| Amy                                                   | McMeans    |                       |                  | Minneapolis Heart Institute Foundation               | Minneapolis, MN, USA                     | Research Coordinator                                    |                                                                                            |
| JoAnne                                                | Goldman    |                       |                  | Minneapolis Heart Institute Foundation               | Minneapolis, MN, USA                     | Research Coordinator                                    |                                                                                            |
| Rose                                                  | Peterson   |                       |                  | Minneapolis Heart Institute Foundation               | Minneapolis, MN, USA                     | Research Coordinator                                    |                                                                                            |
| Isabelle                                              | Tutor      |                       |                  | Ochsner Heart and Vascular Institute                 | New Orleans, LA, USA                     | Investigator                                            |                                                                                            |
| Michael                                               | Harrison   |                       |                  | Ochsner Heart and Vascular Institute                 | New Orleans, LA, USA                     | Research Coordinator                                    |                                                                                            |
| Angel                                                 | Penning    |                       |                  | Ochsner Heart and Vascular Institute                 | New Orleans, LA, USA                     | Research Coordinator                                    |                                                                                            |
| Janice                                                | Lea        |                       |                  | Emory University                                     | Atlanta, GA, USA                         | Investigator                                            |                                                                                            |
| Amanda                                                | Fiebach    |                       |                  | Emory University                                     | Atlanta, GA, USA                         | Research Coordinator                                    |                                                                                            |
| Claudia                                               | Merlin     |                       |                  | Emory University                                     | Atlanta, GA, USA                         | Research Coordinator                                    |                                                                                            |
| Suhail                                                | Dohad      |                       |                  | Cedars-Sinai Medical Center                          | Los Angeles, CA, USA                     | Investigator                                            |                                                                                            |
| Anne                                                  | Tran       |                       |                  | Cedars-Sinai Medical Center                          | Los Angeles, CA, USA                     | Research Coordinator                                    |                                                                                            |
| Kirin                                                 | Bhatia     |                       |                  | Cedars-Sinai Medical Center                          | Los Angeles, CA, USA                     | Research Coordinator                                    |                                                                                            |

## Supplemental Online Content: Nonauthor Collaborators

\*First name, last name, and suffix (if applicable) are required and will appear in PubMed.

| *First Name and Middle Initial(s) | *Last Name  | *Suffix (eg, Jr, III) | Academic Degrees | Institution                             | Location (city, state/province, country) | Role or Contribution, eg, chair, principal investigator | Group (if more than 1 Group listed in the byline) and/or Subgroup (eg, Steering Committee) |
|-----------------------------------|-------------|-----------------------|------------------|-----------------------------------------|------------------------------------------|---------------------------------------------------------|--------------------------------------------------------------------------------------------|
| Piotr                             | Sobieszczyk |                       |                  | The Brigham and Women's Hospital        | Boston, MA, USA                          | Investigator                                            |                                                                                            |
| Ian                               | Halliday    |                       |                  | The Brigham and Women's Hospital        | Boston, MA, USA                          | Research Coordinator                                    |                                                                                            |
| Tay                               | Munson      |                       |                  | The Brigham and Women's Hospital        | Boston, MA, USA                          | Research Coordinator                                    |                                                                                            |
| Steven                            | Laster      |                       |                  | Saint Lukes Hospital of Kansas City     | Kansas City, MO, USA                     | Investigator                                            |                                                                                            |
| Mathew                            | Bunte       |                       |                  | Saint Lukes Hospital of Kansas City     | Kansas City, MO, USA                     | Investigator                                            |                                                                                            |
| Anthony                           | Hart        |                       |                  | Saint Lukes Hospital of Kansas City     | Kansas City, MO, USA                     | Investigator                                            |                                                                                            |
| Dana                              | King        |                       |                  | Saint Lukes Hospital of Kansas City     | Kansas City, MO, USA                     | Research Coordinator                                    |                                                                                            |
| Jamie                             | Hall        |                       |                  | Saint Lukes Hospital of Kansas City     | Kansas City, MO, USA                     | Research Coordinator                                    |                                                                                            |
| Courtney                          | Krathen     |                       |                  | Deborah Heart & Lung Center             | Brown Mills, NJ, USA                     | Investigator                                            |                                                                                            |
| Luot                              | Lewis       |                       |                  | Deborah Heart & Lung Center             | Brown Mills, NJ, USA                     | Research Coordinator                                    |                                                                                            |
| Ashley                            | Willitts    |                       |                  | Deborah Heart & Lung Center             | Brown Mills, NJ, USA                     | Research Coordinator                                    |                                                                                            |
| Anthony                           | Awkar       |                       |                  | Medical University of South Carolina    | Charleston, SC, USA                      | Research Coordinator                                    |                                                                                            |
| Casey                             | Palmer      |                       |                  | Medical University of South Carolina    | Charleston, SC, USA                      | Research Coordinator                                    |                                                                                            |
| Anna                              | Tecklenburg |                       |                  | Medical University of South Carolina    | Charleston, SC, USA                      | Research Coordinator                                    |                                                                                            |
| John                              | Schindler   |                       |                  | University of Pittsburgh Medical Center | Pittsburgh, PA, USA                      | Investigator                                            |                                                                                            |
| Matthew                           | Muldoon     |                       |                  | University of Pittsburgh Medical Center | Pittsburgh, PA, USA                      | Investigator                                            |                                                                                            |

## Supplemental Online Content: Nonauthor Collaborators

\*First name, last name, and suffix (if applicable) are required and will appear in PubMed.

| *First Name and Middle Initial(s) | *Last Name  | *Suffix (eg, Jr, III) | Academic Degrees | Institution                             | Location (city, state/province, country) | Role or Contribution, eg, chair, principal investigator | Group (if more than 1 Group listed in the byline) and/or Subgroup (eg, Steering Committee) |
|-----------------------------------|-------------|-----------------------|------------------|-----------------------------------------|------------------------------------------|---------------------------------------------------------|--------------------------------------------------------------------------------------------|
| MaryJo                            | Albright    |                       |                  | University of Pittsburgh Medical Center | Pittsburgh, PA, USA                      | Research Coordinator                                    |                                                                                            |
| Tracy                             | Nicholson   |                       |                  | University of Pittsburgh Medical Center | Pittsburgh, PA, USA                      | Research Coordinator                                    |                                                                                            |
| Youseff                           | Chami       |                       |                  | Southern Illinois University            | Springfield, IL, USA                     | Investigator                                            |                                                                                            |
| Abdul Moiz                        | Hafiz       |                       |                  | Southern Illinois University            | Springfield, IL, USA                     | Investigator                                            |                                                                                            |
| Emily                             | Starkey     |                       |                  | Southern Illinois University            | Springfield, IL, USA                     | Research Coordinator                                    |                                                                                            |
| Kristal                           | Adams       |                       |                  | Southern Illinois University            | Springfield, IL, USA                     | Research Coordinator                                    |                                                                                            |
| Nelson                            | Bernardo    |                       |                  | MedStar Washington Health Research      | Baltimore, MD, USA                       | Investigator                                            |                                                                                            |
| Judith                            | Veis        |                       |                  | MedStar Washington Health Research      | Baltimore, MD, USA                       | Investigator                                            |                                                                                            |
| Hayder                            | Hashim      |                       |                  | MedStar Washington Health Research      | Baltimore, MD, USA                       | Investigator                                            |                                                                                            |
| Suman                             | Singh       |                       |                  | MedStar Washington Health Research      | Baltimore, MD, USA                       | Research Coordinator                                    |                                                                                            |
| Donna                             | Whitman     |                       |                  | MedStar Washington Health Research      | Baltimore, MD, USA                       | Research Coordinator                                    |                                                                                            |
| Rick                              | Stouffer    |                       |                  | The University of North Carolina        | Chapel Hill, NCU, USA                    | Investigator                                            |                                                                                            |
| Alan                              | Hinderliter |                       |                  | The University of North Carolina        | Chapel Hill, NCU, USA                    | Investigator                                            |                                                                                            |
| Meghan                            | Allen       |                       |                  | The University of North Carolina        | Chapel Hill, NCU, USA                    | Research Coordinator                                    |                                                                                            |
| Tatum                             | Scholl      |                       |                  | The University of North Carolina        | Chapel Hill, NCU, USA                    | Research Coordinator                                    |                                                                                            |
| Pete                              | Fong        |                       |                  | Vanderbilt University Medical Center    | Nashville, TN, USA                       | Investigator                                            |                                                                                            |
| James                             | Gainer      |                       |                  | Vanderbilt University Medical Center    | Nashville, TN, USA                       | Investigator                                            |                                                                                            |

## Supplemental Online Content: Nonauthor Collaborators

\*First name, last name, and suffix (if applicable) are required and will appear in PubMed.

| *First Name and Middle Initial(s) | *Last Name    | *Suffix (eg, Jr, III) | Academic Degrees | Institution                          | Location (city, state/province, country) | Role or Contribution, eg, chair, principal investigator | Group (if more than 1 Group listed in the byline) and/or Subgroup (eg, Steering Committee) |
|-----------------------------------|---------------|-----------------------|------------------|--------------------------------------|------------------------------------------|---------------------------------------------------------|--------------------------------------------------------------------------------------------|
| Sherron                           | Crook         |                       |                  | Vanderbilt University Medical Center | Nashville, TN, USA                       | Research Coordinator                                    |                                                                                            |
| Ellen                             | Hatchcock     |                       |                  | Vanderbilt University Medical Center | Nashville, TN, USA                       | Research Coordinator                                    |                                                                                            |
| Debbie                            | Cohen         |                       |                  | Penn Medicine                        | Philadelphia, PA, USA                    | Investigator                                            |                                                                                            |
| Jay                               | Giri          |                       |                  | Penn Medicine                        | Philadelphia, PA, USA                    | Investigator                                            |                                                                                            |
| Taisei                            | Kobayashi     |                       |                  | Penn Medicine                        | Philadelphia, PA, USA                    | Investigator                                            |                                                                                            |
| Robin                             | Neubauer      |                       |                  | Penn Medicine                        | Philadelphia, PA, USA                    | Research Coordinator                                    |                                                                                            |
| Suveeksha                         | Naidu         |                       |                  | Penn Medicine                        | Philadelphia, PA, USA                    | Research Coordinator                                    |                                                                                            |
| Jai                               | Radhakrishnan |                       |                  | Columbia University Medical Center   | New York, NY, USA                        | Investigator                                            |                                                                                            |
| Candido                           | Batres        |                       |                  | Columbia University Medical Center   | New York, NY, USA                        | Research Coordinator                                    |                                                                                            |
| Suzanne                           | Edwards       |                       |                  | Columbia University Medical Center   | New York, NY, USA                        | Research Coordinator                                    |                                                                                            |
| Matheen                           | Khuddus       |                       |                  | The Cardiac and Vascular Institute   | Gainesville, FL, USA                     | Investigator                                            |                                                                                            |
| Suzanne                           | Zentko        |                       |                  | The Cardiac and Vascular Institute   | Gainesville, FL, USA                     | Investigator                                            |                                                                                            |
| Abby                              | Touchton      |                       |                  | The Cardiac and Vascular Institute   | Gainesville, FL, USA                     | Research Coordinator                                    |                                                                                            |
| Marti                             | Roberson      |                       |                  | The Cardiac and Vascular Institute   | Gainesville, FL, USA                     | Research Coordinator                                    |                                                                                            |
| Abhilash                          | Akinapelli    |                       |                  | Renown Regional Medical Center       | Reno, NV, USA                            | Investigator                                            |                                                                                            |
| Lisa                              | English       |                       |                  | Renown Regional Medical Center       | Reno, NV, USA                            | Research Coordinator                                    |                                                                                            |
| Bridget                           | Neumann       |                       |                  | Renown Regional Medical Center       | Reno, NV, USA                            | Research Coordinator                                    |                                                                                            |
| Farrel                            | Mendelsohn    |                       |                  | Cardiology PC                        | Birmingham, AL, USA                      | Investigator                                            |                                                                                            |
| Hutton                            | Brantley      |                       |                  | Cardiology PC                        | Birmingham, AL, USA                      | Investigator                                            |                                                                                            |
| Thomas                            | Cawthon       |                       |                  | Cardiology PC                        | Birmingham, AL, USA                      | Investigator                                            |                                                                                            |

## Supplemental Online Content: Nonauthor Collaborators

\*First name, last name, and suffix (if applicable) are required and will appear in PubMed.

| *First Name and Middle Initial(s) | *Last Name   | *Suffix (eg, Jr, III) | Academic Degrees | Institution                       | Location (city, state/province, country) | Role or Contribution, eg, chair, principal investigator | Group (if more than 1 Group listed in the byline) and/or Subgroup (eg, Steering Committee) |
|-----------------------------------|--------------|-----------------------|------------------|-----------------------------------|------------------------------------------|---------------------------------------------------------|--------------------------------------------------------------------------------------------|
| Susan                             | DeRamus      |                       |                  | Cardiology PC                     | Birmingham, AL, USA                      | Research Coordinator                                    |                                                                                            |
| Wesley                            | Wade         |                       |                  | Cardiology PC                     | Birmingham, AL, USA                      | Research Coordinator                                    |                                                                                            |
| Robert                            | Fishman      |                       |                  | Bridgeport Hospital               | Bridgeport, CT, USA                      | Investigator                                            |                                                                                            |
| Edward                            | Tuohy        |                       |                  | Bridgeport Hospital               | Bridgeport, CT, USA                      | Investigator                                            |                                                                                            |
| Jessica                           | LeBlanc      |                       |                  | Bridgeport Hospital               | Bridgeport, CT, USA                      | Research Coordinator                                    |                                                                                            |
| Tina                              | McCurry      |                       |                  | Bridgeport Hospital               | Bridgeport, CT, USA                      | Research Coordinator                                    |                                                                                            |
| Amar                              | Krishnaswamy |                       |                  | Cleveland Clinic Foundation       | Cleveland, OH, USA                       | Investigator                                            |                                                                                            |
| Luke                              | Laffin       |                       |                  | Cleveland Clinic Foundation       | Cleveland, OH, USA                       | Investigator                                            |                                                                                            |
| Christopher                       | Bajzer       |                       |                  | Cleveland Clinic Foundation       | Cleveland, OH, USA                       | Investigator                                            |                                                                                            |
| Marilyn                           | Boros        |                       |                  | Cleveland Clinic Foundation       | Cleveland, OH, USA                       | Research Coordinator                                    |                                                                                            |
| Monica                            | Branche      |                       |                  | Cleveland Clinic Foundation       | Cleveland, OH, USA                       | Research Coordinator                                    |                                                                                            |
| Josephine                         | Abraham      |                       |                  | University of Utah Medical Center | Salt Lake City, UT, USA                  | Investigator                                            |                                                                                            |
| Anu                               | Abraham      |                       |                  | University of Utah Medical Center | Salt Lake City, UT, USA                  | Investigator                                            |                                                                                            |
| Inge                              | Stijleman    |                       |                  | University of Utah Medical Center | Salt Lake City, UT, USA                  | Research Coordinator                                    |                                                                                            |
| David                             | Hsi          |                       |                  | Stamford Hospital                 | Stamford, CT, USA                        | Investigator                                            |                                                                                            |
| Scott                             | Martin       |                       |                  | Stamford Hospital                 | Stamford, CT, USA                        | Investigator                                            |                                                                                            |
| Edward                            | Portnay      |                       |                  | Stamford Hospital                 | Stamford, CT, USA                        | Investigator                                            |                                                                                            |
| Maryann                           | Fiebach      |                       |                  | Stamford Hospital                 | Stamford, CT, USA                        | Research Coordinator                                    |                                                                                            |
| Carolina                          | Garavito     |                       |                  | Stamford Hospital                 | Stamford, CT, USA                        | Research Coordinator                                    |                                                                                            |
| Todd                              | Adams        |                       |                  | Munson Medical Center             | Traverse City, MI, USA                   | Investigator                                            |                                                                                            |
| Andrew                            | Teklinski    |                       |                  | Munson Medical Center             | Traverse City, MI, USA                   | Investigator                                            |                                                                                            |
| Adam                              | Leech        |                       |                  | Munson Medical Center             | Traverse City, MI, USA                   | Investigator                                            |                                                                                            |

## Supplemental Online Content: Nonauthor Collaborators

\*First name, last name, and suffix (if applicable) are required and will appear in PubMed.

| *First Name and Middle Initial(s) | *Last Name | *Suffix (eg, Jr, III) | Academic Degrees | Institution             | Location (city, state/province, country) | Role or Contribution, eg, chair, principal investigator | Group (if more than 1 Group listed in the byline) and/or Subgroup (eg, Steering Committee) |
|-----------------------------------|------------|-----------------------|------------------|-------------------------|------------------------------------------|---------------------------------------------------------|--------------------------------------------------------------------------------------------|
| Patrick                           | Drilling   |                       |                  | Munson Medical Center   | Traverse City, MI, USA                   | Research Coordinator                                    |                                                                                            |
| Lynda                             | Tulik      |                       |                  | Munson Medical Center   | Traverse City, MI, USA                   | Research Coordinator                                    |                                                                                            |
| Keith                             | Benzuly    |                       |                  | Northwestern University | Chicago, IL, USA                         | Investigator                                            |                                                                                            |
| James                             | Paparello  |                       |                  | Northwestern University | Chicago, IL, USA                         | Investigator                                            |                                                                                            |
| Dan                               | Fintel     |                       |                  | Northwestern University | Chicago, IL, USA                         | Investigator                                            |                                                                                            |
| Haydee                            | Ramirez    |                       |                  | Northwestern University | Chicago, IL, USA                         | Research Coordinator                                    |                                                                                            |
| Lauren                            | Kats       |                       |                  | Northwestern University | Chicago, IL, USA                         | Research Coordinator                                    |                                                                                            |
| Paul                              | Huang      |                       |                  | Swedish Medical Center  | Seattle, WA, USA                         | Investigator                                            |                                                                                            |
| Santanu                           | Biswas     |                       |                  | Swedish Medical Center  | Seattle, WA, USA                         | Investigator                                            |                                                                                            |
| Serena                            | Risher     |                       |                  | Swedish Medical Center  | Seattle, WA, USA                         | Research Coordinator                                    |                                                                                            |
| Kristina                          | Pratt      |                       |                  | Swedish Medical Center  | Seattle, WA, USA                         | Research Coordinator                                    |                                                                                            |
| Uzoma                             | Ibebuogu   |                       |                  | University of Tennessee | Memphis, TN, USA                         | Investigator                                            |                                                                                            |
| Karen                             | Johnson    |                       |                  | University of Tennessee | Memphis, TN, USA                         | Investigator                                            |                                                                                            |
| William                           | Cushman    |                       |                  | University of Tennessee | Memphis, TN, USA                         | Investigator                                            |                                                                                            |
| Lisa                              | Jones      |                       |                  | University of Tennessee | Memphis, TN, USA                         | Research Coordinator                                    |                                                                                            |
| Leigh                             | Jackson    |                       |                  | University of Tennessee | Memphis, TN, USA                         | Research Coordinator                                    |                                                                                            |
| David                             | Landers    |                       |                  | Hackensack University   | Hackensack, NJ, USA                      | Investigator                                            |                                                                                            |
| Tilak                             | Pasala     |                       |                  | Hackensack University   | Hackensack, NJ, USA                      | Investigator                                            |                                                                                            |
| Thomas                            | Salazer    |                       |                  | Hackensack University   | Hackensack, NJ, USA                      | Investigator                                            |                                                                                            |
| Peter                             | Canino     |                       |                  | Hackensack University   | Hackensack, NJ, USA                      | Research Coordinator                                    |                                                                                            |
| Patricia                          | Arakelian  |                       |                  | Hackensack University   | Hackensack, NJ, USA                      | Research Coordinator                                    |                                                                                            |

## Supplemental Online Content: Nonauthor Collaborators

\*First name, last name, and suffix (if applicable) are required and will appear in PubMed.

| *First Name and Middle Initial(s) | *Last Name | *Suffix (eg, Jr, III) | Academic Degrees | Institution                                | Location (city, state/province, country) | Role or Contribution, eg, chair, principal investigator | Group (if more than 1 Group listed in the byline and/or Subgroup (eg, Steering Committee)) |
|-----------------------------------|------------|-----------------------|------------------|--------------------------------------------|------------------------------------------|---------------------------------------------------------|--------------------------------------------------------------------------------------------|
| Yi-Ming                           | Yang       |                       |                  | Northwell Health                           | New York, NY, USA                        | Investigator                                            |                                                                                            |
| Asma                              | Khaliq     |                       |                  | Northwell Health                           | New York, NY, USA                        | Investigator                                            |                                                                                            |
| Mitchell                          | Weinberg   |                       |                  | Northwell Health                           | New York, NY, USA                        | Investigator                                            |                                                                                            |
| Yihnew                            | Abetu      |                       |                  | Northwell Health                           | New York, NY, USA                        | Research Coordinator                                    |                                                                                            |
| Alana                             | Gulliver   |                       |                  | Northwell Health                           | New York, NY, USA                        | Research Coordinator                                    |                                                                                            |
| JP                                | Reilly     |                       |                  | Stony Brook Medicine                       | Stony Brook, New York                    | Investigator                                            |                                                                                            |
| Joseph                            | Garasic    |                       |                  | Massachusetts General Hospital             | Boston, MA, USA                          | Investigator                                            |                                                                                            |
| Atul                              | Chugh      |                       |                  | Franciscan Health                          | Indianapolis, IN, USA                    | Investigator                                            |                                                                                            |
| Barry                             | Bertolet   |                       |                  | Cardiology Associates of North Mississippi | Tupelo, MS, USA                          | Investigator                                            |                                                                                            |
| Brian                             | Go         |                       |                  | WakeMed Clinical Research Institute        | Raleigh, NC, USA                         | Investigator                                            |                                                                                            |
| Raghava                           | Gollapudi  |                       |                  | San Diego Cardiac Center                   | San Diego, CA, USA                       | Investigator                                            |                                                                                            |
| Joel                              | Cohn       |                       |                  | Sparrow Clinical Research Institut         | Lansing, MI, USA                         | Investigator                                            |                                                                                            |
| Kevin                             | Rogers     |                       |                  | University of Colorado                     | Denver, CO, USA                          | Investigator                                            |                                                                                            |
| Anthony                           | Mathur     |                       |                  | St Barts Health                            | United Kingdom                           | Investigator                                            |                                                                                            |
| Ajay                              | Jain       |                       |                  | St Barts Health                            | United Kingdom                           | Investigator                                            |                                                                                            |
| Armida                            | Balawon    |                       |                  | St Barts Health                            | United Kingdom                           | Research Coordinator                                    |                                                                                            |
| Oliver                            | Zongo      |                       |                  | St Barts Health                            | United Kingdom                           | Research Coordinator                                    |                                                                                            |
| Christine                         | Topham     |                       |                  | St Barts Health                            | United Kingdom                           | Research Coordinator                                    |                                                                                            |
| Richard                           | Anderson   |                       |                  | University Hospital of Wales Cardiff       | United Kingdom                           | Investigator                                            |                                                                                            |
| Elizabeth                         | Thompson   |                       |                  | University Hospital of Wales Cardiff       | United Kingdom                           | Research Coordinator                                    |                                                                                            |
| Nikki                             | Spiro      |                       |                  | University Hospital of Wales Cardiff       | United Kingdom                           | Research Coordinator                                    |                                                                                            |

## Supplemental Online Content: Nonauthor Collaborators

\*First name, last name, and suffix (if applicable) are required and will appear in PubMed.

| *First Name and Middle Initial(s) | *Last Name | *Suffix (eg, Jr, III) | Academic Degrees | Institution                                                 | Location (city, state/province, country) | Role or Contribution, eg, chair, principal investigator | Group (if more than 1 Group listed in the byline) and/or Subgroup (eg, Steering Committee) |
|-----------------------------------|------------|-----------------------|------------------|-------------------------------------------------------------|------------------------------------------|---------------------------------------------------------|--------------------------------------------------------------------------------------------|
| Elizabeth                         | Hodges     |                       |                  | University Hospital of Wales Cardiff                        | United Kingdom                           | Research Coordinator                                    |                                                                                            |
| Timothy                           | Ellam      |                       |                  | Freeman Hospital Newcastle                                  | United Kingdom                           | Investigator                                            |                                                                                            |
| Alan                              | Bagnall    |                       |                  | Freeman Hospital Newcastle                                  | United Kingdom                           | Investigator                                            |                                                                                            |
| Ralph                             | Jackson    |                       |                  | Freeman Hospital Newcastle                                  | United Kingdom                           | Investigator                                            |                                                                                            |
| Victoria                          | Bridgett   |                       |                  | Freeman Hospital Newcastle                                  | United Kingdom                           | Research Coordinator                                    |                                                                                            |
| Peter                             | Wilson     |                       |                  | Freeman Hospital Newcastle                                  | United Kingdom                           | Research Coordinator                                    |                                                                                            |
| Neelanjan                         | Das        |                       |                  | Kent and Canterbury Hospital                                | United Kingdom                           | Investigator                                            |                                                                                            |
| Timothy                           | Doulton    |                       |                  | Kent and Canterbury Hospital                                | United Kingdom                           | Investigator                                            |                                                                                            |
| David                             | Loader     |                       |                  | Kent and Canterbury Hospital                                | United Kingdom                           | Research Coordinator                                    |                                                                                            |
| Gemma                             | Hector     |                       |                  | Kent and Canterbury Hospital                                | United Kingdom                           | Research Coordinator                                    |                                                                                            |
| Terry                             | Levy       |                       |                  | Royal Bournemouth Hospital                                  | United Kingdom                           | Investigator                                            |                                                                                            |
| Clare                             | Bent       |                       |                  | Royal Bournemouth Hospital                                  | United Kingdom                           | Investigator                                            |                                                                                            |
| Vivek                             | Kodoth     |                       |                  | Royal Bournemouth Hospital                                  | United Kingdom                           | Investigator                                            |                                                                                            |
| Stephanie                         | Horler     |                       |                  | Royal Bournemouth Hospital                                  | United Kingdom                           | Research Coordinator                                    |                                                                                            |
| Sara                              | Nix        |                       |                  | Royal Bournemouth Hospital                                  | United Kingdom                           | Research Coordinator                                    |                                                                                            |
| Nicholas                          | Robinson   |                       |                  | Cardiothoracic Centre Basildon<br>University Hospital Essex | United Kingdom                           | Investigator                                            |                                                                                            |
| Firas                             | Al-Janabi  |                       |                  | Cardiothoracic Centre Basildon<br>University Hospital Essex | United Kingdom                           | Investigator                                            |                                                                                            |
| Jeremy                            | Sayer      |                       |                  | Cardiothoracic Centre Basildon<br>University Hospital Essex | United Kingdom                           | Investigator                                            |                                                                                            |
| Sudha Ganesh                      | Iyer       |                       |                  | Cardiothoracic Centre Basildon<br>University Hospital Essex | United Kingdom                           | Investigator                                            |                                                                                            |

## Supplemental Online Content: Nonauthor Collaborators

\*First name, last name, and suffix (if applicable) are required and will appear in PubMed.

| *First Name and Middle Initial(s) | *Last Name      | *Suffix (eg, Jr, III) | Academic Degrees | Institution                                              | Location (city, state/province, country) | Role or Contribution, eg, chair, principal investigator | Group (if more than 1 Group listed in the byline) and/or Subgroup (eg, Steering Committee) |
|-----------------------------------|-----------------|-----------------------|------------------|----------------------------------------------------------|------------------------------------------|---------------------------------------------------------|--------------------------------------------------------------------------------------------|
| Emily                             | Redman          |                       |                  | Cardiothoracic Centre Basildon University Hospital Essex | United Kingdom                           | Research Coordinator                                    |                                                                                            |
| Jonaifah                          | Ramirez         |                       |                  | Cardiothoracic Centre Basildon University Hospital Essex | United Kingdom                           | Research Coordinator                                    |                                                                                            |
| Sandosh                           | Padmanabhan     |                       |                  | Queen Elizabeth University Hospital Glasgow              | United Kingdom                           | Investigator                                            |                                                                                            |
| Faisal                            | Sharif          |                       |                  | University Hospital Galway                               | Ireland                                  | Investigator                                            |                                                                                            |
| Aishah                            | Alhmodi         |                       |                  | University Hospital Galway                               | Ireland                                  | Investigator                                            |                                                                                            |
| Mattia                            | Lunardi         |                       |                  | University Hospital Galway                               | Ireland                                  | Investigator                                            |                                                                                            |
| Eileen                            | Coen            |                       |                  | University Hospital Galway                               | Ireland                                  | Research Coordinator                                    |                                                                                            |
| Nicola                            | Glynn           |                       |                  | University Hospital Galway                               | Ireland                                  | Research Coordinator                                    |                                                                                            |
| Lucas                             | Lauder          |                       |                  | University Clinic of Saarland-Homburg                    | Germany                                  | Investigator                                            |                                                                                            |
| Saarraaken                        | Kulenthiran     |                       |                  | University Clinic of Saarland-Homburg                    | Germany                                  | Investigator                                            |                                                                                            |
| Christina                         | Koch            |                       |                  | University Clinic of Saarland-Homburg                    | Germany                                  | Research Coordinator                                    |                                                                                            |
| Angelika                          | Wachter         |                       |                  | University Clinic of Saarland-Homburg                    | Germany                                  | Research Coordinator                                    |                                                                                            |
| Axel                              | Schmid          |                       |                  | University Clinic Erlangen                               | Germany                                  | Investigator                                            |                                                                                            |
| Dennis                            | Kannenkeril     |                       |                  | University Clinic Erlangen                               | Germany                                  | Investigator                                            |                                                                                            |
| Ulrike                            | Heinritz        |                       |                  | University Clinic Erlangen                               | Germany                                  | Research Coordinator                                    |                                                                                            |
| Kerstin                           | Endres-Frohlich |                       |                  | University Clinic Erlangen                               | Germany                                  | Research Coordinator                                    |                                                                                            |
| Karl Philipp                      | Rommel          |                       |                  | Heart Center Leipzig                                     | Germany                                  | Investigator                                            |                                                                                            |
| Karl                              | Fengler         |                       |                  | Heart Center Leipzig                                     | Germany                                  | Investigator                                            |                                                                                            |
| Martin                            | Petzold         |                       |                  | Heart Center Leipzig                                     | Germany                                  | Research Coordinator                                    |                                                                                            |

## Supplemental Online Content: Nonauthor Collaborators

\*First name, last name, and suffix (if applicable) are required and will appear in PubMed.

| *First Name and Middle Initial(s) | *Last Name    | *Suffix (eg, Jr, III) | Academic Degrees | Institution                       | Location (city, state/province, country) | Role or Contribution, eg, chair, principal investigator | Group (if more than 1 Group listed in the byline and/or Subgroup (eg, Steering Committee)) |
|-----------------------------------|---------------|-----------------------|------------------|-----------------------------------|------------------------------------------|---------------------------------------------------------|--------------------------------------------------------------------------------------------|
| Margit                            | Büttner       |                       |                  | Heart Center Leipzig              | Germany                                  | Research Coordinator                                    |                                                                                            |
| Joachim                           | Weil          |                       |                  | Sana Kliniken Lubeck GmbH         | Germany                                  | Investigator                                            |                                                                                            |
| Tolga                             | Agdirlioglu   |                       |                  | Sana Kliniken Lubeck GmbH         | Germany                                  | Investigator                                            |                                                                                            |
| Tanja                             | Köllner       |                       |                  | Sana Kliniken Lubeck GmbH         | Germany                                  | Research Coordinator                                    |                                                                                            |
| Jeannine                          | Stephan       |                       |                  | Sana Kliniken Lubeck GmbH         | Germany                                  | Research Coordinator                                    |                                                                                            |
| Nikolaos                          | Dagkonakis    |                       |                  | Klinikum Konstanz                 | Germany                                  | Investigator                                            |                                                                                            |
| Frank                             | Hamann        |                       |                  | Klinikum Konstanz                 | Germany                                  | Investigator                                            |                                                                                            |
| Ute                               | Ettl          |                       |                  | Klinikum Konstanz                 | Germany                                  | Research Coordinator                                    |                                                                                            |
| Ulrike                            | Petzsche      |                       |                  | Klinikum Konstanz                 | Germany                                  | Research Coordinator                                    |                                                                                            |
| Peter                             | Reimer        |                       |                  | Klinikum Karlsruhe                | Germany                                  | Investigator                                            |                                                                                            |
| Martin                            | Hausberg      |                       |                  | Klinikum Karlsruhe                | Germany                                  | Investigator                                            |                                                                                            |
| Ralf                              | Hinrichs      |                       |                  | Klinikum Karlsruhe                | Germany                                  | Research Coordinator                                    |                                                                                            |
| Isabella                          | Di Ponio-Voit |                       |                  | Klinikum Karlsruhe                | Germany                                  | Research Coordinator                                    |                                                                                            |
| Matthias                          | Lutz          |                       |                  | UKSH Kiel                         | Germany                                  | Investigator                                            |                                                                                            |
| Philippe                          | Gosse         |                       |                  | Hôpital Saint-André – CHU         | France                                   | Investigator                                            |                                                                                            |
| Antoine                           | Cremer        |                       |                  | Hôpital Saint-André – CHU         | France                                   | Investigator                                            |                                                                                            |
| Panteleimon                       | Papadopoulos  |                       |                  | Hôpital Saint-André – CHU         | France                                   | Investigator                                            |                                                                                            |
| Julie                             | Gaudissard    |                       |                  | Hôpital Saint-André – CHU         | France                                   | Research Coordinator                                    |                                                                                            |
| Florent                           | Maire         |                       |                  | Hôpital Saint-André – CHU         | France                                   | Research Coordinator                                    |                                                                                            |
| Marc                              | Sapoval       |                       |                  | Hôpital Européen Georges-Pompidou | France                                   | Investigator                                            |                                                                                            |

## Supplemental Online Content: Nonauthor Collaborators

\*First name, last name, and suffix (if applicable) are required and will appear in PubMed.

| *First Name and Middle Initial(s) | *Last Name    | *Suffix (eg, Jr, III) | Academic Degrees | Institution                          | Location (city, state/province, country) | Role or Contribution, eg, chair, principal investigator | Group (if more than 1 Group listed in the byline) and/or Subgroup (eg, Steering Committee) |
|-----------------------------------|---------------|-----------------------|------------------|--------------------------------------|------------------------------------------|---------------------------------------------------------|--------------------------------------------------------------------------------------------|
| Marine                            | Livrozet      |                       |                  | Hôpital Européen Georges-Pompidou    | France                                   | Investigator                                            |                                                                                            |
| Asma                              | Regrag        |                       |                  | Hôpital Européen Georges-Pompidou    | France                                   | Research Coordinator                                    |                                                                                            |
| Valerie                           | Paquet        |                       |                  | Hôpital Européen Georges-Pompidou    | France                                   | Research Coordinator                                    |                                                                                            |
| Pascal                            | Delsart       |                       |                  | CHRU Lille                           | France                                   | Investigator                                            |                                                                                            |
| Justin                            | Hennicaux     |                       |                  | CHRU Lille                           | France                                   | Investigator                                            |                                                                                            |
| Coralie                           | Sommeville    |                       |                  | CHRU Lille                           | France                                   | Research Coordinator                                    |                                                                                            |
| Fabien                            | Bertrand      |                       |                  | CHRU Lille                           | France                                   | Research Coordinator                                    |                                                                                            |
| Melvin                            | Lafeber       |                       |                  | Erasmus MC Rotterdam                 | The Netherlands                          | Investigator                                            |                                                                                            |
| Victor                            | Zeijen        |                       |                  | Erasmus MC Rotterdam                 | The Netherlands                          | Research Coordinator                                    |                                                                                            |
| Amo                               | Ruiter        |                       |                  | Erasmus MC Rotterdam                 | The Netherlands                          | Research Coordinator                                    |                                                                                            |
| Jan                               | van Ramshorst |                       |                  | Noordwest Zienkenhuisgroeo – Alkmaar | The Netherlands                          | Investigator                                            |                                                                                            |
| Panagiotis                        | Xaplanteris   |                       |                  | UMC Saint Pierre                     | Belgium                                  | Investigator                                            |                                                                                            |
| Rachid                            | Briki         |                       |                  | UMC Saint Pierre                     | Belgium                                  | Investigator                                            |                                                                                            |
| Quentin                           | de Hemptinne  |                       |                  | UMC Saint Pierre                     | Belgium                                  | Investigator                                            |                                                                                            |
| Severine                          | Pascal        |                       |                  | UMC Saint Pierre                     | Belgium                                  | Research Coordinator                                    |                                                                                            |
| Katty                             | Renard        |                       |                  | UMC Saint Pierre                     | Belgium                                  | Research Coordinator                                    |                                                                                            |
| Pascal                            | Lefebvre      |                       |                  | Hopital Civel Marie Curie Charleroi  | Belgium                                  | Investigator                                            |                                                                                            |
| Bert                              | Ferdinande    |                       |                  | ZOL Genk                             | Belgium                                  | Investigator                                            |                                                                                            |
| Juan                              | Iglesias      |                       |                  | Hopitaux Universitaires Geneva       | Switzzlerland                            | Investigator                                            |                                                                                            |
| Georg                             | Ehert         |                       |                  | Hopitaux Universitaires Geneva       | Switzzlerland                            | Investigator                                            |                                                                                            |

Supplemental Online Content: Nonauthor Collaborators

\*First name, last name, and suffix (if applicable) are required and will appear in PubMed.

| <b>*First Name and Middle Initial(s)</b> | <b>*Last Name</b> | <b>*Suffix (eg, Jr, III)</b> | Academic Degrees | Institution                    | Location (city, state/province, country) | Role or Contribution, eg, chair, principal investigator | Group (if more than 1 Group listed in the byline) and/or Subgroup (eg, Steering Committee) |
|------------------------------------------|-------------------|------------------------------|------------------|--------------------------------|------------------------------------------|---------------------------------------------------------|--------------------------------------------------------------------------------------------|
| Laetitia                                 | Gallego           |                              |                  | Hopitaux Universitaires Geneva | Switzerland                              | Research Coordinator                                    |                                                                                            |
| Kevin                                    | Dobretz           |                              |                  | Hopitaux Universitaires Geneva | Switzerland                              | Research Coordinator                                    |                                                                                            |
