# Supplementary material
Source: PubMed Central journal article supplement (PMC9975904)
Supplement: jama-e230713-s005.pdf [file jama-e230713-s005.pdf]

## Data Sharing Statement

Azizi. Endovascular Ultrasound Renal Denervation to Treat Hypertension. *JAMA*. Published February 28, 2023. doi:10.1001/jama.2023.0713

### Data

**Data available:** Yes

**Data types:** Deidentified participant data

**How to access data:** [michel.azizi@aphp.fr](mailto:michel.azizi@aphp.fr)

**When available:** beginning date: 04-01-2027

### Supporting Documents

**Document types:** None

### Additional Information

**Who can access the data:** Data will be shared upon reasonable request with researchers who submit a research proposal approved by the study principal investigators (Michel Azizi and Ajay J. Kirtane).

**Types of analyses:** For a specified purpose

**Mechanisms of data availability:** After approval of a proposal by the study principal investigators

**Any additional restrictions:** Data will be made available after research completion and approval of the product and product use in the EU and the USA.
